# Supplementary material for: Association between early ondansetron administration and in-hospital mortality in critically ill patients: analysis of the MIMIC-IV database
Source: J Transl Med. 2022 May 14;20:223. doi: 10.1186/s12967-022-03401-y (PMC9107069; doi:10.1186/s12967-022-03401-y)
Supplement: Supplementary file 2 — Additional file 2: Table S1. Percentage of missing data in the variables in the interest. [file 12967_2022_3401_MOESM2_ESM.xlsx]

## Sheet: Sheet1
Table A1 Percentage of missing data in the variables in the interest.
	MIMIC-IV
	(n = 51342)
Baseline characteristics
Age, years	0
Men, gender	0
Ethnicity	0.105
Admission type	0
ICU types	0
Comorbidities at ICU admission
Myocardial infarct	0
Congestive heart failure	0
Peripheral vascular disease	0
Cerebrovascular disease	0
Dementia	0
Chronic pulmonary disease	0
Rheumatic disease	0
Peptic ulcer disease	0
Liver disease	0
Diabetes	0
Paraplegia	0
Renal disease	0
Malignant cancer	0
Metastatic solid tumor	0
AIDS	0
Need of support in the first 24 hours
Vasopressors	0
MV	0
RRT	0
Primary diagnosis	0.004
Severity of illness
SOFA score	0
SAPS II score	0
Outcome
In-hospital death	0
Ondansetron use	0
Ondansetron dose	0
